# Supplementary figures and images for: Integrin-dependent and -independent functions of astrocytic fibronectin in retinal angiogenesis
Source: Oxford University Press journal article supplement (doi:10.1242/dev.071381), 2011-09-01

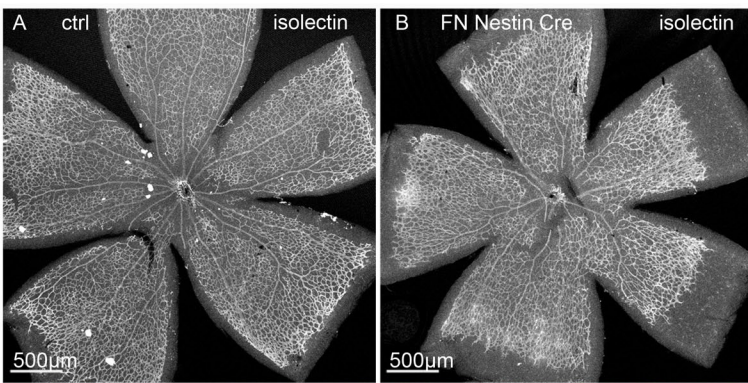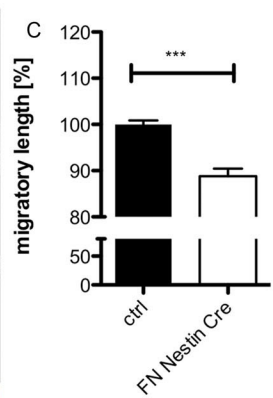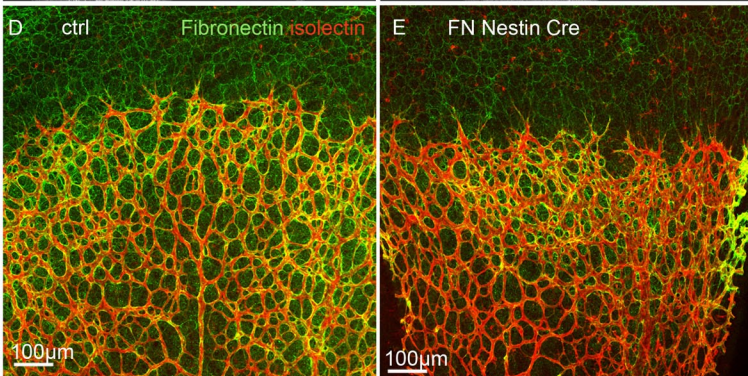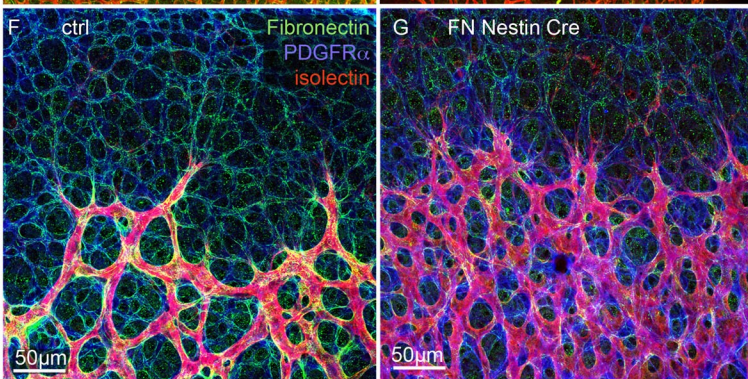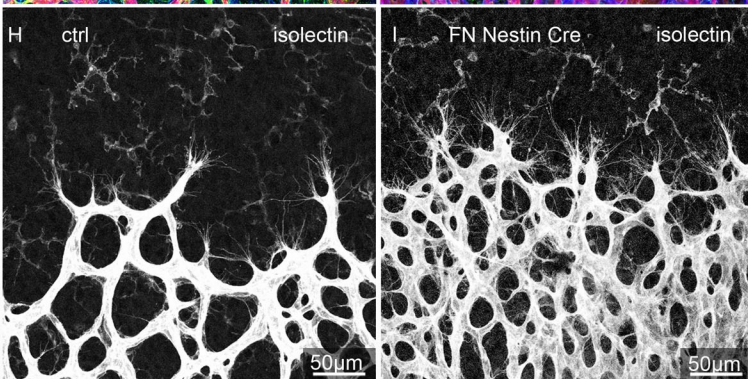

Supplement: dev071381figs3.pdf [file dev071381figs3.pdf]

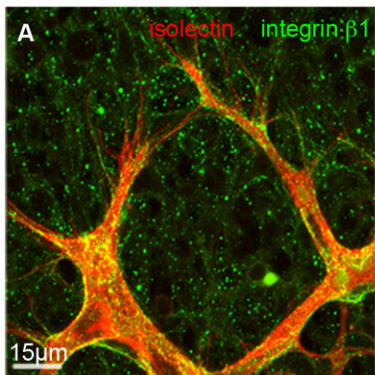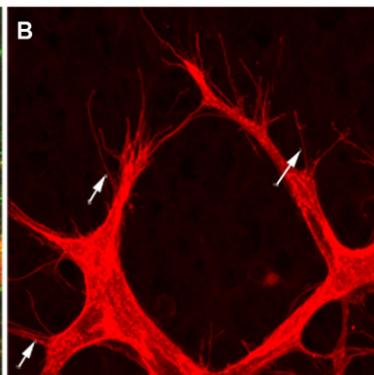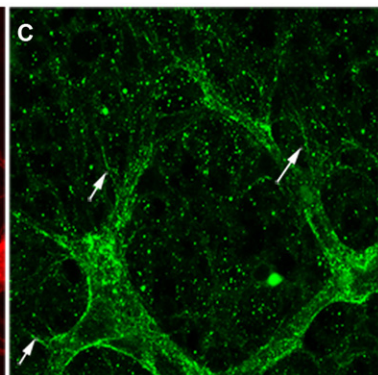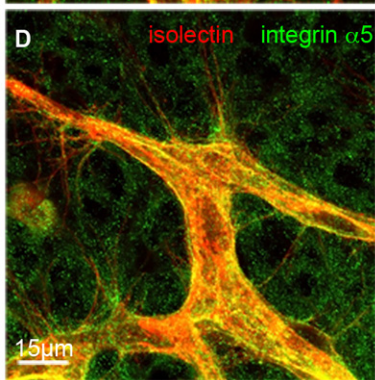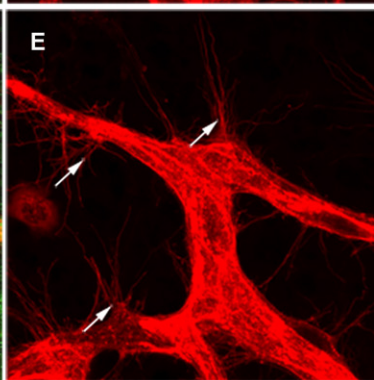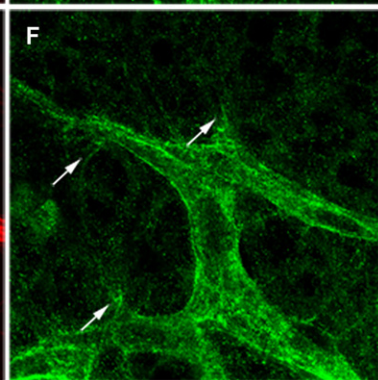

Supplement: dev071381figs4.pdf [file dev071381figs4.pdf]

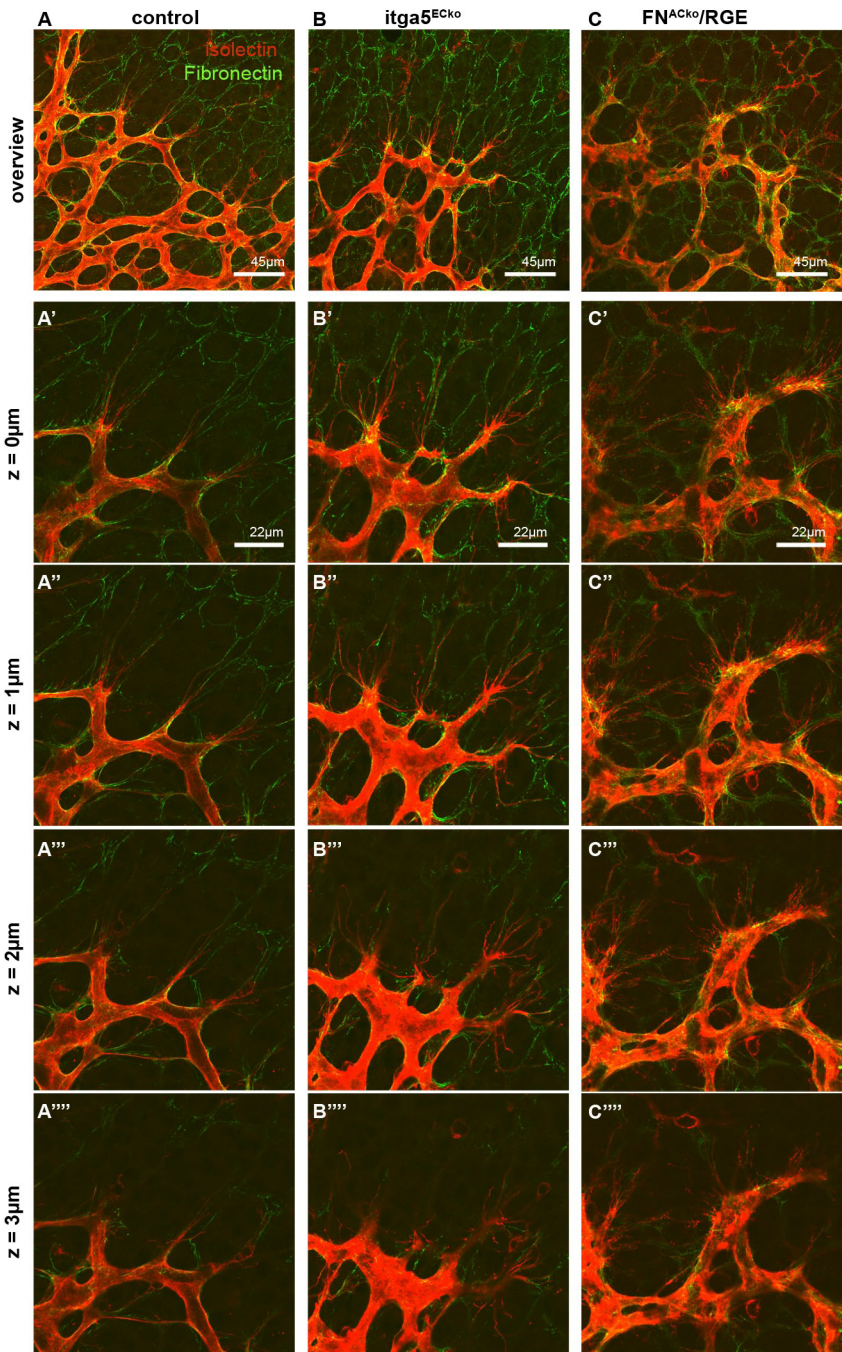

Supplement: dev071381figs5.pdf [file dev071381figs5.pdf]
